# Supplementary material
Source: PubMed Central journal article supplement (PMC3323009)
Supplement: supp_M111.312694_jbc.M111.312694-1.pdf [file supp_M111.312694_jbc.M111.312694-1.pdf]

# Nrf2 up-regulates anti-apoptotic protein Bcl-2 and prevents cellular apoptosis

Niture SK and Jaiswal AK

## Supplement Figure 1

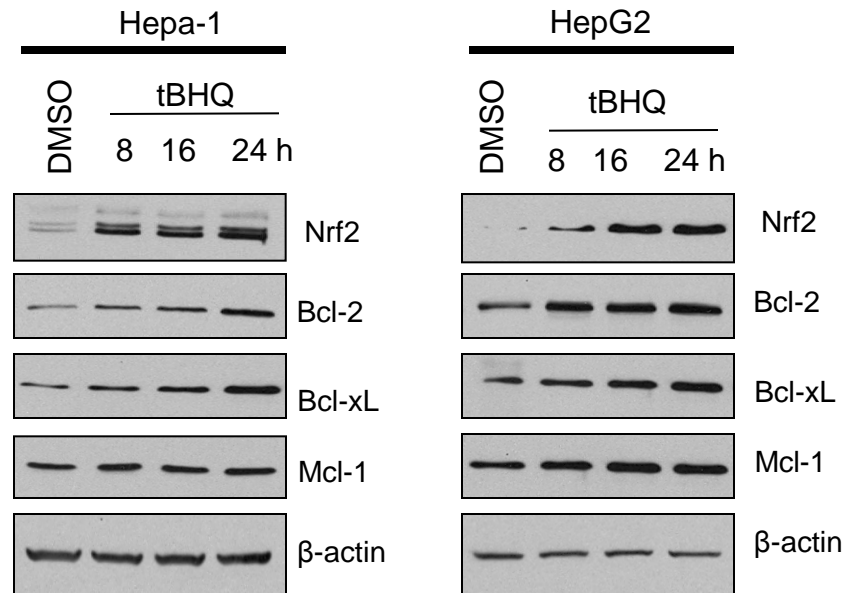

**FIGURE S1-** Hepa-1 or HepG2 cells were treated with DMSO or tBHQ for 8-24 h as indicated. Cells were lysed in RIPA buffer and sixty micrograms lysates were immunoblotted with anti-Nrf2 antibody, anti-Bcl-2 antibody, anti Bcl-xL antibody, anti-Mcl-1 antibody and anti- $\beta$ -actin antibody.
